# Supplementary material
Source: publisher figshare collection journal article supplement (https://aacr.figshare.com/articles/dataset/_/22473170)
Supplement: Supplementary file 1 [file 39924662]

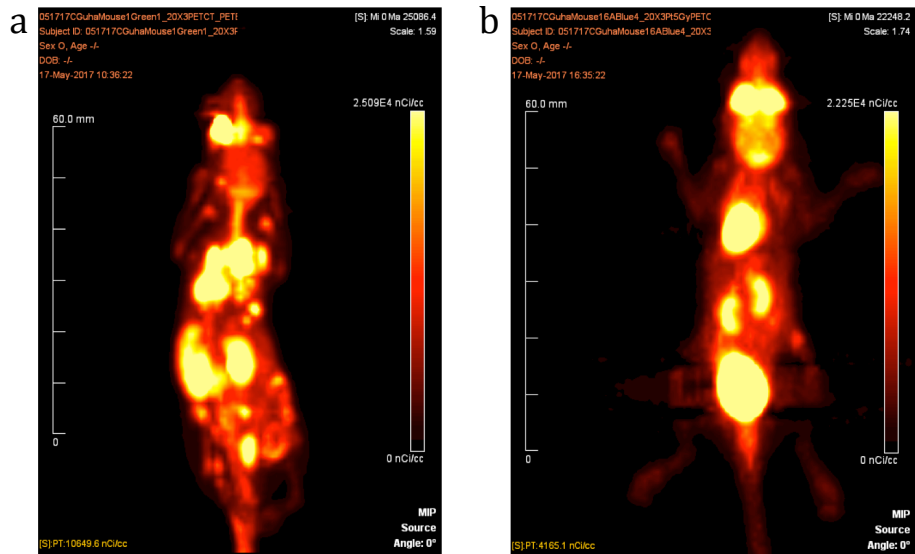

**Supplementary Figure3. Decreased metastatic progression by PET in systemic PAM treated mice.**

a) PET scan for metastatic lesions 28 days after primary tumor ablation. Representative of 7 images. b) PET scan for metastatic lesions 28 days after primary tumor ablation and 12 days after whole lung irradiation. Representative of 6 images.
